# Supplementary material for: Synthesis of tungsten carbide and tungsten disulfide on vertically aligned multi-walled carbon nanotube forests and their application as non-Pt electrocatalysts for the hydrogen evolution reaction
Source: Royal Society of Chemistry journal article supplement (doi:10.1039/c5ta02908b), 2015-01-01
Supplement: c5ta02908b1.pdf [file c5ta02908b1.pdf]

**Supplementary information**

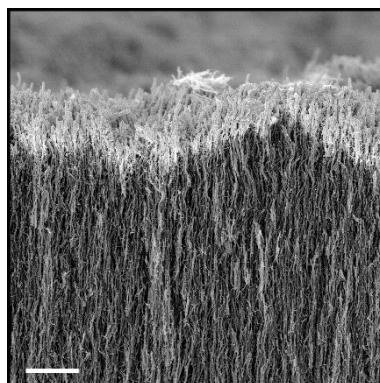

**Figure S1** Cross-section image of a CNT forest coated with 150 nm tungsten. The scale bar is 5  $\mu\text{m}$ .

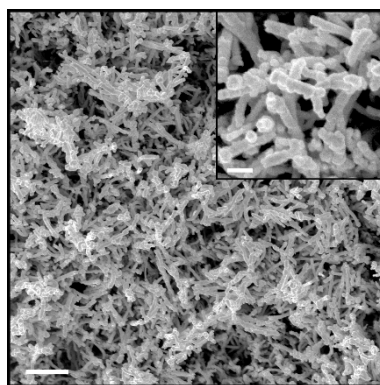

**Figure S2** SEM image of a CNT forest coated with 30 nm tungsten. The scale bars are 1  $\mu\text{m}$  and 200 nm for the figure and inset, respectively.
